# Supplementary material for: Genetic Diversity of Fish in Aquaculture and of Common Carp (Cyprinus carpio) in Traditional Rice–Fish Coculture
Source: MDPI journal article supplement (doi:10.3390/agriculture12070997), 2022-07-11
Supplement: s1 [file s1]

Table S1. Information of 20 polymorphic microsatellite loci for *C. carpio*.

| Primer | Forward                  | Backward                  | Reference |
|--------|--------------------------|---------------------------|-----------|
| MFW29  | FGTTGACCAAGAAACCAACATGC  | GAAGCTTTGCTCTAATCCACG     | [1]       |
| Koi09  | TGGTTATGGTTATGAATGAG     | CTTCAGGGACAGATGGTTTG      | [2]       |
| Koi29  | CTGACCCTGAAGAGAACAAC     | GCCTCATCAAAGACATCAAG      | [2]       |
| Koi49  | CAGAGGGGAAGAAGTGAG       | GGACAAGGATTTTCAGACA       | [2]       |
| Koi55  | TGCCCTCTCTTTCCTTCATC     | CAGGCTTCAACACAAACACA      | [2]       |
| Koi57  | TGTCCTTTATTGCTCAGAAC     | CCACCACATTCATCACAT        | [2]       |
| HLJ04  | TCAAATAGCCTTGGTGAGCTT    | TTCTCCTCTTCAACCCAACG      | [3]       |
| HLJ09  | GGGGTCTGTGTGTTGGTCTT     | CGGGGGAAATGTGTTTAAAGT     | [3]       |
| HLJ10  | TAGTGGGCACTGCAACTGTC     | CATTCATTGTCATTTTGAGAAAGG  | [3]       |
| HLJ11  | TTAGCCAGCCAGAGACAAGC     | CACTGCCACAAACCCATCTA      | [3]       |
| CCE24  | TGCAAACGAGCAAATTGAGT     | ATTTTGCTTGTAGCCCGTTG      | [4]       |
| CCE26  | TGTGAGAAGCAGAGCGATATT    | TCAGTATTTATGTGTTGTTTCCA   | [4]       |
| CCE29  | CAGCAACAGACAGGAGGACA     | CCGCAATTAACAATCCCAAC      | [4]       |
| Cca02  | ATGCAGGGCTCATGTTGCTCATAG | GCAGACAGACACGTTGCTCTCG    | [5]       |
| Cca07  | CCATTGCGCTGTAATATGAGGTTT | CGCTTCAACACCAGGGGACTG     | [5]       |
| Cca12  | ACGCGTCCGGCTGACATTAGAGC  | ACAACCCCCGATCCCCAACACA    | [5]       |
| Cca14  | GCAAAGTCCCATTCTACCCACTCA | CTGCCACCTGCTGTTTCATTCATAA | [5]       |
| Cca16  | AATGTTTTTCGCTAATTTGACACC | ACAGCATCATTATACACCGATTCA  | [5]       |
| Cca59  | TTTGCCAAATTTGCTACTGTTATG | TTTGCGGAAAATTACTTCCAGA    | [5]       |
| Cca72  | CAGGCCAGATCTATCATCATCAA  | CTGCTGTTGGATATGCACTACATC  | [5]       |

Table S2. Source data in meta-analysis of the effect of aquaculture on aquatic animals (weighted by the inverse of variance).

| No.     | Species                     | Effect size (Na) | Var    | Effect size (He) | Var    | Reference |
|---------|-----------------------------|------------------|--------|------------------|--------|-----------|
| Study 1 | <i>Salmon salar</i>         | 0                | 0.0044 | -0.0057          | 0.0038 | [6]       |
| Study 2 | <i>Oncorhynchus mykiss</i>  | 0.0151           | 0.0057 | 0.0219           | 0.0012 | [7]       |
| Study 3 | <i>Scophthalmus maximus</i> | 0.236            | 0.0589 | -0.0221          | 0.0016 | [8]       |
| Study 4 | <i>Oreochromis shiranus</i> | -0.5005          | 0.0282 | -0.0496          | 0.014  | [9]       |

|          |                                    |         |        |         |        |      |
|----------|------------------------------------|---------|--------|---------|--------|------|
| Study 5  | <i>Salmo salar</i>                 | -0.1767 | 0.0465 | -0.0833 | 0.0028 | [10] |
| Study 6  | <i>Penaeus monodon</i>             | -0.6208 | 0.2987 | -0.0709 | 0.0074 | [11] |
| Study 7  | <i>Salmo salar</i>                 | -0.2451 | 0.016  | -0.0244 | 0.0054 | [12] |
| Study 8  | <i>Paralichthys olivaceus</i>      | -0.6509 | 0.0311 | -0.1222 | 0.0033 | [13] |
| Study 9  | <i>Sparus aurata</i>               | -0.2723 | 0.006  | -0.0209 | 0.0003 | [14] |
| Study 10 | <i>Haliotis midae</i>              | -0.3398 | 0.1123 | 0.0225  | 0.0089 | [15] |
| Study 11 | <i>Oncorhynchus tshawytscha</i>    | -0.5556 | 0.0148 | -0.1007 | 0.0011 | [16] |
| Study 12 | <i>Haliotis discus hannai</i>      | -1.4165 | 0.0822 | -0.2243 | 0.0051 | [17] |
| Study 13 | <i>Salvelinus namaycush</i>        | 0.047   | 0.0037 | 0.0005  | 0.0009 | [18] |
| Study 14 | <i>Salmo salar</i>                 | -0.5578 | 0.0061 | -0.1119 | 0.001  | [19] |
| Study 15 | <i>Cyprinus carpio</i>             | 0.0141  | 0.0414 | -0.0256 | 0.0018 | [20] |
| Study 16 | <i>Salvelinus alpinus</i>          | -0.6206 | 0.0286 | -0.1129 | 0.0031 | [21] |
| Study 17 | <i>Oncorhynchus mykiss</i>         | -0.2614 | 0.0137 | -0.0785 | 0.0428 | [22] |
| Study 18 | <i>Oncorhynchus mykiss</i>         | -0.0618 | 0.0002 | 0.0079  | 0      | [23] |
| Study 19 | <i>Gadus morhua</i>                | -0.2064 | 0.0016 | -0.0184 | 0      | [24] |
| Study 20 | <i>Ostrea edulis</i>               | -0.2278 | 0.0083 | -0.0385 | 0.0008 | [25] |
| Study 21 | <i>Macrobrachium rosenbergii</i>   | 0.0146  | 0.0037 | 0.0043  | 0.001  | [26] |
| Study 22 | <i>Oncorhynchus mykiss</i>         | 0.2592  | 0.5065 | 0.3825  | 0.502  | [27] |
| Study 23 | <i>Cyprinus carpio</i>             | -0.5257 | 0.0288 | -0.1478 | 0.0057 | [28] |
| Study 24 | <i>Patinopecten yessoensis</i>     | -0.3323 | 0.0121 | -0.1429 | 0.0005 | [29] |
| Study 25 | <i>Cyprinus carpio</i>             | -0.2263 | 0.0047 | -0.1623 | 0.001  | [30] |
| Study 26 | <i>Oncorhynchus tshawytscha</i>    | -0.3646 | 0.0033 | -0.0629 | 0.0002 | [31] |
| Study 27 | <i>Clupea pallasii</i>             | -0.127  | 0.0954 | -0.0184 | 0.0016 | [33] |
| Study 28 | <i>Plagopterus argentissimus</i>   | -0.133  | 0.0022 | -0.0169 | 0      | [34] |
| Study 29 | <i>Patella caerulea</i>            | -0.0663 | 0.0003 | -0.036  | 0.0002 | [35] |
| Study 30 | <i>Pangasianodon hypophthalmus</i> | -0.1094 | 0.0062 | -0.0173 | 0.0003 | [36] |
| Study 31 | <i>Pagrosomus major</i>            | -0.2544 | 0.0958 | na      | na     | [37] |
| Study 32 | <i>Clupea pallasii</i>             | -0.4473 | 0.0033 | -0.1173 | 0.0004 | [38] |
| Study 33 | <i>Pinctada maxima</i>             | 0.0429  | 0.0376 | -0.0293 | 0.008  | [39] |
| Study 34 | <i>Ctenopharyngodon idella</i>     | 0.2094  | 0.0373 | -0.009  | 0.0023 | [40] |
| Study 35 | <i>Pangasianodon hypophthalmus</i> | 0.0294  | 0.0032 | 0.0483  | 0.0017 | [41] |
| Study 36 | <i>Lates calcarifer</i>            | -0.603  | 0.0304 | -0.2264 | 0.0062 | [42] |
| Study 37 | <i>Cirrhinus cirrhosus</i>         | 0.0113  | 0.0249 | 0.0155  | 0.0038 | [43] |
| Study 38 | <i>Nodipecten subnodosus</i>       | -0.8908 | 0.087  | -0.206  | 0.007  | [44] |
| Study 39 | <i>Sebastes inermis</i>            | -0.0403 | 0.0048 | -0.0028 | 0      | [45] |
| Study 40 | <i>Haliotis discus hannai</i>      | -0.1586 | 0.0133 | -0.0193 | 0.0005 | [46] |
| Study 41 | <i>Crassostrea gigas</i>           | -0.1829 | 0.001  | -0.0443 | 0.0005 | [47] |
| Study 42 | <i>Perna viridis</i>               | -0.082  | 0.0183 | -0.0223 | 0.0005 | [48] |
| Study 43 | <i>Cirrhinus molitorella</i>       | -0.7531 | 0.0557 | -0.1629 | 0.0198 | [49] |
| Study 44 | <i>Larimichthys crocea</i>         | -0.0765 | 0.0015 | -0.0116 | 0.0019 | [50] |
| Study 45 | <i>Oncorhynchus masou</i>          | -0.3471 | 0.0016 | -0.2084 | 0.001  | [51] |
| Study 46 | <i>Thamnaconus modestus</i>        | -0.252  | 0.0051 | -0.0439 | 0.0003 | [52] |
| Study 47 | <i>Cyprinus carpio</i>             | -0.1319 | 0.0021 | -0.0125 | 0.0002 | [53] |
| Study 48 | <i>Platichthys stellatus</i>       | -0.4609 | 0.0222 | -0.0058 | 0.0008 | [54] |

|          |                                  |         |        |         |        |       |
|----------|----------------------------------|---------|--------|---------|--------|-------|
| Study 49 | <i>Oncorhynchus mykiss</i>       | -0.196  | 0.0117 | -0.0626 | 0.0038 | [55]  |
| Study 50 | <i>Oncorhynchus tshawytscha</i>  | -0.1456 | 0.0005 | -0.014  | 0      | [56]  |
| Study 51 | <i>Crassostrea gigas</i>         | -0.0323 | 0.0008 | -0.0126 | 0.0003 | [57]  |
| Study 52 | <i>Oncorhynchus keta</i>         | -0.2193 | 0.0003 | 0.0091  | 0      | [58]  |
| Study 53 | <i>Ruditapes philippinarum</i>   | -0.0477 | 0.0004 | -0.0106 | 0      | [59]  |
| Study 54 | <i>Mercenaria mercenaria</i>     | -0.1465 | 0.0004 | -0.0367 | 0.0005 | [60]  |
| Study 55 | <i>Melanotaenia boesemani</i>    | 0.0167  | 0.0156 | 0.0075  | 0.0009 | [61]  |
| Study 56 | <i>Culter alburnus</i>           | -0.2378 | 0.0194 | -0.0163 | 0.0132 | [62]  |
| Study 57 | <i>Macrobrachium rosenbergii</i> | -0.1823 | 0.0241 | -0.1038 | 0.018  | [63]  |
| Study 58 | <i>Siniperca chuatsi</i>         | -0.0561 | 0.0051 | -0.0198 | 0.0001 | [64]  |
| Study 59 | <i>Salvelinus alpinus</i>        | -0.5961 | 0.0095 | -0.6015 | 0.0034 | [65]  |
| Study 60 | <i>Dicentrarchus labrax</i>      | 0.3729  | 0.0075 | -0.0669 | 0.0003 | [105] |
| Study 61 | <i>Percocypris pingi</i>         | -0.0574 | 0.0193 | -0.0229 | 0.0037 | [106] |
| Study 62 | <i>Paracentrotus lividus</i>     | -0.3252 | 0.0002 | -0.0606 | 0.0013 | [107] |
| Study 63 | <i>Lates calcarifer</i>          | -0.023  | 0.007  | -0.0622 | 0.0007 | [108] |
| Study 64 | <i>Crassostrea virginica</i>     | -0.4626 | 0.0131 | -0.1074 | 0.002  | [109] |
| Study 65 | <i>Piaractus mesopotamicus</i>   | -0.0429 | 0.1299 | -0.0511 | 0.1269 | [110] |
| Study 66 | <i>Rhabdosargus sarba</i>        | -0.4537 | 0.032  | -0.0526 | 0.0008 | [111] |
| Study 67 | <i>Arapaima gigas</i>            | -0.0362 | 0.0045 | -0.1947 | 0.2293 | [112] |
| Study 68 | <i>Salmo ischchan</i>            | 0.1125  | 0.0436 | 0.0861  | 0.0239 | [113] |
| Study 69 | <i>Oncorhynchus mykiss</i>       | -0.4963 | 0.0301 | -0.0618 | 0.0018 | [114] |
| Study 70 | <i>Salvelinus fontinalis</i>     | -0.3248 | 0.0324 | -0.1215 | 0.0035 | [115] |
| Study 71 | <i>Salmo trutta</i>              | 0.5673  | 0.0305 | 0.5465  | 0.0199 | [116] |
| Study 72 | <i>Arapaima gigas</i>            | -0.2379 | 0.0328 | -0.0855 | 0.0072 | [117] |
| Study 73 | <i>Piaractus brachypomus</i>     | 0.1861  | 0.0133 | -0.0683 | 0.0122 | [118] |
| Study 74 | <i>Hyphessobrycon eques</i>      | 0.1301  | 0.0352 | -0.0332 | 0.0154 | [119] |
| Study 75 | <i>Crassostrea sikamea</i>       | 0.1996  | 0.0067 | 0.1015  | 0.0009 | [120] |
| Study 76 | <i>Clarias gariepinus</i>        | -0.2798 | 0.0284 | -0.0591 | 0.0071 | [121] |
| Study 77 | <i>Sander lucioperca</i>         | 0.0126  | 0.0159 | 0.7368  | 0.3125 | [122] |

Table S3. Source data in meta-analysis of the effect of aquaculture on aquatic animals (weighted by population replicates).

| No.      | Species                            | Effect size (Na) | Effect size (He) | Weight | Reference |
|----------|------------------------------------|------------------|------------------|--------|-----------|
| Study 1  | <i>Salmon salar</i>                | 0.0000           | 0.0057           | 1.0000 | [6]       |
| Study 2  | <i>Oncorhynchus mykiss</i>         | -0.0151          | -0.0219          | 6.0000 | [7]       |
| Study 3  | <i>Scophthalmus maximus</i>        | 0.2360           | 0.0221           | 1.0000 | [8]       |
| Study 4  | <i>Oreochromis shiranus</i>        | 0.5005           | 0.0496           | 2.2500 | [9]       |
| Study 5  | <i>Salmo salar</i>                 | 0.1767           | 0.0833           | 1.7143 | [10]      |
| Study 6  | <i>Penaeus monodon</i>             | 0.6208           | 0.0709           | 1.3333 | [11]      |
| Study 7  | <i>Salmo salar</i>                 | 0.2451           | 0.0244           | 2.5455 | [12]      |
| Study 8  | <i>Paralichthys olivaceus</i>      | 0.6509           | 0.1222           | 1.5000 | [13]      |
| Study 9  | <i>Sparus aurata</i>               | 0.2723           | 0.0209           | 2.7273 | [14]      |
| Study 10 | <i>Haliotis midae</i>              | 0.3398           | -0.0225          | 1.0000 | [15]      |
| Study 11 | <i>Oncorhynchus tshawytscha</i>    | 0.5556           | 0.1007           | 1.0000 | [16]      |
| Study 12 | <i>Haliotis discus hannai</i>      | 1.4165           | 0.2243           | 1.2000 | [17]      |
| Study 13 | <i>Salvelinus namaycush</i>        | -0.0470          | -0.0005          | 3.6000 | [18]      |
| Study 14 | <i>Salmo salar</i>                 | 0.5578           | 0.1119           | 2.5455 | [19]      |
| Study 15 | <i>Cyprinus carpio</i>             | -0.0141          | 0.0256           | 1.5000 | [20]      |
| Study 16 | <i>Salvelinus alpinus</i>          | 0.6206           | 0.1129           | 2.3077 | [21]      |
| Study 17 | <i>Oncorhynchus mykiss</i>         | 0.2614           | 0.0785           | 2.5455 | [22]      |
| Study 18 | <i>Oncorhynchus mykiss</i>         | 0.0618           | -0.0079          | 1.5000 | [23]      |
| Study 19 | <i>Gadus morhua</i>                | 0.2064           | 0.0184           | 1.5000 | [24]      |
| Study 20 | <i>Ostrea edulis</i>               | 0.2278           | 0.0385           | 2.4000 | [25]      |
| Study 21 | <i>Macrobrachium rosenbergii</i>   | -0.0146          | -0.0043          | 1.4286 | [26]      |
| Study 22 | <i>Oncorhynchus mykiss</i>         | -0.2592          | -0.3825          | 1.5000 | [27]      |
| Study 23 | <i>Cyprinus carpio</i>             | 0.5257           | 0.1478           | 1.3333 | [28]      |
| Study 24 | <i>Patinopecten yessoensis</i>     | 0.3323           | 0.1429           | 1.2000 | [29]      |
| Study 25 | <i>Cyprinus carpio</i>             | 0.2263           | 0.1623           | 4.2000 | [30]      |
| Study 26 | <i>Oncorhynchus tshawytscha</i>    | 0.3646           | 0.0629           | 4.6316 | [31]      |
| Study 27 | <i>Apostichopus japonicus</i>      | -0.0861          | 0.0336           | 1.4286 | [32]      |
| Study 28 | <i>Clupea pallasii</i>             | 0.1270           | 0.0184           | 1.6000 | [33]      |
| Study 29 | <i>Plagopterus argentissimus</i>   | 0.1330           | 0.0169           | 2.2222 | [34]      |
| Study 30 | <i>Patella caerulea</i>            | 0.0663           | 0.0360           | 3.4286 | [35]      |
| Study 31 | <i>Pangasianodon hypophthalmus</i> | 0.1094           | 0.0173           | 1.7143 | [36]      |
| Study 32 | <i>Clupea pallasii</i>             | 0.2544           | na               | 1.5000 | [37]      |
| Study 33 | <i>Pinctada maxima</i>             | 0.4473           | 0.1173           | 1.8750 | [38]      |
| Study 34 | <i>Ctenopharyngodon idella</i>     | -0.0429          | 0.0293           | 2.2222 | [39]      |
| Study 35 | <i>Pangasianodon hypophthalmus</i> | -0.2094          | 0.0090           | 2.0000 | [40]      |
| Study 36 | <i>Oncorhynchus mykiss</i>         | -0.0294          | -0.0483          | 3.2143 | [41]      |
| Study 37 | <i>Lates calcarifer</i>            | 0.6030           | 0.2264           | 2.2222 | [42]      |
| Study 38 | <i>Cirrhinus cirrhosus</i>         | -0.0113          | -0.0155          | 2.5000 | [43]      |
| Study 39 | <i>Nodipecten subnodosus</i>       | 0.8908           | 0.2060           | 2.9167 | [44]      |
| Study 40 | <i>Sebastes inermis</i>            | 0.0403           | 0.0028           | 1.5000 | [45]      |
| Study 41 | <i>Haliotis discus hannai</i>      | 0.1586           | 0.0193           | 2.1818 | [46]      |

|          |                                         |         |         |        |      |
|----------|-----------------------------------------|---------|---------|--------|------|
| Study 42 | <i>Crassostrea gigas</i>                | 0.1829  | 0.0443  | 1.5000 | [47] |
| Study 43 | <i>Perna viridis</i>                    | 0.0820  | 0.0223  | 1.2000 | [48] |
| Study 44 | <i>Cirrhinus molitorella</i>            | 0.7531  | 0.1629  | 2.5455 | [49] |
| Study 45 | <i>Haliotis midae</i>                   | 0.0765  | 0.0116  | 1.5000 | [50] |
| Study 46 | <i>Larimichthys crocea</i>              | 0.3471  | 0.2084  | 1.8750 | [51] |
| Study 47 | <i>Oncorhynchus masou</i>               | 0.2520  | 0.0439  | 2.1818 | [52] |
| Study 48 | <i>Thamnaconus modestus</i>             | 0.1319  | 0.0125  | 1.3333 | [53] |
| Study 49 | <i>Cyprinus carpio</i>                  | 0.4609  | 0.0058  | 2.5000 | [54] |
| Study 50 | <i>Platichthys stellatus</i>            | 0.1960  | 0.0626  | 1.7143 | [55] |
| Study 51 | <i>Oncorhynchus mykiss</i>              | 0.1456  | 0.0140  | 4.0000 | [56] |
| Study 52 | <i>Oncorhynchus tshawytscha</i>         | 0.0323  | 0.0126  | 2.4000 | [57] |
| Study 53 | <i>Crassostrea gigas Thunberg</i>       | 0.2193  | -0.0091 | 1.2000 | [58] |
| Study 54 | <i>Oncorhynchus keta</i>                | 0.0477  | 0.0106  | 9.3947 | [59] |
| Study 55 | <i>Ruditapes philippinarum</i>          | 0.1465  | 0.0367  | 1.3333 | [60] |
| Study 56 | <i>Mercenaria mercenaria</i>            | -0.0167 | -0.0075 | 2.4000 | [61] |
| Study 57 | <i>Melanotaenia boesemani</i>           | 0.2378  | 0.0163  | 1.5000 | [62] |
| Study 58 | <i>Culter alburnus</i>                  | 0.1823  | 0.1038  | 1.4286 | [63] |
| Study 59 | <i>Macrobrachium rosenbergii</i>        | 0.0561  | 0.0198  | 1.5000 | [64] |
| Study 60 | <i>Siniperca chuatsi</i>                | 0.5961  | 0.6015  | 3.6000 | [65] |
| Study 61 | <i>Chrysichthys nigrodigitatus</i>      | 0.9502  | 0.1031  | 0.8000 | [66] |
| Study 62 | <i>Hippoglossus hippoglossus</i>        | 0.3977  | 0.0591  | 0.8000 | [67] |
| Study 63 | <i>Haliotis rubra</i>                   | 1.1904  | 0.1031  | 0.8000 | [68] |
| Study 64 | <i>Brycon opalinus</i>                  | -0.1684 | 0.0963  | 0.8750 | [69] |
| Study 65 | <i>Crassostrea virginica</i>            | 0.5656  | 0.1288  | 0.5000 | [70] |
| Study 66 | <i>Solea senegalensis</i>               | 0.2091  | 0.0227  | 0.5000 | [71] |
| Study 67 | <i>Lates calcarifer</i>                 | -0.0706 | 0.0134  | 0.6667 | [72] |
| Study 68 | <i>Argopecten irradians</i>             | 0.2513  | 0.0714  | 0.6667 | [73] |
| Study 69 | <i>Oncorhynchus mykiss gairdneri</i>    | 0.6061  | 0.1511  | 0.5000 | [74] |
| Study 70 | <i>Pagrosomus major</i>                 | 0.5967  | 0.0147  | 0.8000 | [75] |
| Study 71 | <i>Cirrhinus molitorella</i>            | 0.1546  | 0.1200  | 0.5000 | [76] |
| Study 72 | <i>Pagrosomus major</i>                 | 0.5967  | na      | 0.8000 | [77] |
| Study 73 | <i>Haliotis kamtschatkana</i>           | 0.8495  | 0.1920  | 0.7500 | [78] |
| Study 74 | <i>Acanthopagrus schlegelii</i>         | 0.1684  | 0.0196  | 0.5000 | [79] |
| Study 75 | <i>Haliotis discus hannai</i>           | 0.3361  | 0.1275  | 0.5000 | [80] |
| Study 76 | <i>Polydactylus sexfilis</i>            | -0.1241 | -0.0070 | 0.5000 | [81] |
| Study 77 | <i>Platichthys stellatus</i>            | 0.3939  | 0.1011  | 0.5000 | [82] |
| Study 78 | <i>Stephanolepis cirrhifer</i>          | 0.0706  | 0.0214  | 0.5000 | [83] |
| Study 79 | <i>Atrina pectinata</i>                 | 0.0924  | 0.0036  | 0.5000 | [84] |
| Study 80 | <i>Thamnaconus modestus</i>             | 0.2183  | 0.0149  | 0.5000 | [85] |
| Study 81 | <i>Phalacrotonus bleekeri</i>           | 0.5388  | 0.1200  | 0.6667 | [86] |
| Study 82 | <i>Larimichthys crocea</i>              | 0.1621  | 0.0958  | 0.8333 | [87] |
| Study 83 | <i>Miichthys miiuy</i>                  | 1.0954  | 0.1041  | 0.5000 | [88] |
| Study 84 | <i>Haliotis diversicolor supertexta</i> | 0.0387  | 0.0161  | 0.5000 | [89] |
| Study 85 | <i>Alosa sapidissima</i>                | 0.1427  | 0.0059  | 0.5000 | [90] |

|           |                                 |         |         |         |       |
|-----------|---------------------------------|---------|---------|---------|-------|
| Study 86  | <i>Solea senegalensis</i>       | 0.5539  | 0.0964  | 0.5000  | [91]  |
| Study 87  | <i>Stichopus japonicus</i>      | 0.5223  | -0.0080 | 0.5000  | [92]  |
| Study 88  | <i>Lateolabrax maculatus</i>    | 0.2427  | 0.0498  | 0.5000  | [93]  |
| Study 89  | <i>Crassostrea gigas</i>        | -0.0586 | -0.0065 | 0.5000  | [94]  |
| Study 90  | <i>Haplozenys nitens</i>        | 0.6824  | 0.1759  | 0.5000  | [95]  |
| Study 91  | <i>Salmo trutta</i>             | 0.2148  | 0.0492  | 0.5000  | [96]  |
| Study 92  | <i>Ruditapes decussatus</i>     | 0.1568  | 0.0280  | 2.9167  | [97]  |
| Study 93  | <i>Dicentrarchus labrax</i>     | 0.1075  | 0.1170  | 0.6667  | [98]  |
| Study 94  | <i>Pleuronectes yokohamae</i>   | -0.4700 | 0.0529  | 0.5000  | [99]  |
| Study 95  | <i>Haliotis midae</i>           | 0.3446  | 0.0843  | 0.5000  | [100] |
| Study 96  | <i>Mylopharyngodon piceus</i>   | 0.2298  | 0.3072  | 0.5000  | [101] |
| Study 97  | <i>Salvelinus fontinalis</i>    | 0.1603  | 0.0423  | 0.9000  | [102] |
| Study 98  | <i>Panopea generosa</i>         | 0.1431  | 0.0213  | 0.5000  | [103] |
| Study 99  | <i>Oncorhynchus masou masou</i> | -0.0896 | -0.0700 | 0.6667  | [104] |
| Study 100 | <i>Dicentrarchus labrax</i>     | 0.3729  | -0.0669 | 3.7500  | [105] |
| Study 101 | <i>Percocypris pingi</i>        | -0.0574 | -0.0229 | 1.0000  | [106] |
| Study 102 | <i>Paracentrotus lividus</i>    | -0.3252 | -0.0606 | 1.3333  | [107] |
| Study 103 | <i>Lates calcarifer</i>         | -0.0230 | -0.0622 | 2.1818  | [108] |
| Study 104 | <i>Crassostrea virginica</i>    | -0.4626 | -0.1074 | 3.0769  | [109] |
| Study 105 | <i>Piaractus mesopotamicus</i>  | -0.0429 | -0.0511 | 2.6667  | [110] |
| Study 106 | <i>Rhabdosargus sarba</i>       | -0.4537 | -0.0526 | 1.6364  | [111] |
| Study 107 | <i>Arapaima gigas</i>           | -0.0362 | -0.1947 | 2.1000  | [112] |
| Study 108 | <i>Salmo ischchan</i>           | 0.1125  | 0.0861  | 13.2000 | [113] |
| Study 109 | <i>Oncorhynchus mykiss</i>      | -0.4963 | -0.0618 | 1.0000  | [114] |
| Study 110 | <i>Salvelinus fontinalis</i>    | -0.3248 | -0.1215 | 4.3750  | [115] |
| Study 111 | <i>Salmo trutta</i>             | 0.5673  | 0.5465  | 2.6087  | [116] |
| Study 112 | <i>Arapaima gigas</i>           | -0.2379 | -0.0855 | 1.7143  | [117] |
| Study 113 | <i>Piaractus brachypomus</i>    | 0.1861  | -0.0683 | 13.0370 | [118] |
| Study 114 | <i>Hyphessobrycon eques</i>     | 0.1301  | -0.0332 | 4.0000  | [119] |
| Study 115 | <i>Crassostrea sikamea</i>      | 0.1996  | 0.1015  | 1.5556  | [120] |
| Study 116 | <i>Clarias gariepinus</i>       | -0.2798 | -0.0591 | 2.0000  | [121] |
| Study 117 | <i>Sander lucioperca</i>        | 0.0126  | 0.7368  | 2.1000  | [122] |

---

## References

1. Crooijmans, R.P.M.A.; Bierbooms, V.A.F.; Komen, J.; VanderPoel, J.J.; Groenen, M.A.M. Microsatellite markers in common carp (*Cyprinus carpio* L). *Anim. Genet.* **1997**, *28*, 129-134.
2. David, L.; Rajasekaran, P.; Fang, J.; Hillel, J.; Lavi, U. Polymorphism in ornamental and common carp strains (*Cyprinus carpio* L.) as revealed by AFLP analysis and a new set of microsatellite markers. *Mol. Genet. Genomics.* **2001**, *266*, 353-362.
3. Wei, D.W.; Lou, Y.D.; Sun, X.Y.; Shen, J.B. Screening of microsatellite markers in common carp. *Zoological Res.* **2001**, *223*, 238-241.
4. Wang, D.; Liao, X.L.; Cheng, L.; Yu, X.M.; Tong, J.G. Development of novel EST-SSR markers in common carp by data mining from public EST sequences. *Aquaculture* **2007**, *271*, 558-574.
5. Yue, G.H.; Ho, M.Y.; Orban, L.; Komen, J. Microsatellites within genes and ESTs of common carp and their applicability in silver crucian carp. *Aquaculture* **2004**, *234*, 85-98.
6. Tessier, N.; Bernatchez, L.; Presa, P.; Angers, B. Gene diversity analysis of mitochondrial DNA, microsatellites and allozymes in landlocked Atlantic salmon. *J. Fish Biol.* **1995**, *47*, 156-163.
7. Nielsen, J.L.; Carpanzano, C.; Fountain, M.C.; Gan, C.A. Mitochondrial DNA and nuclear microsatellite diversity in hatchery and wild *Oncorhynchus mykiss* from freshwater habitats in southern California. *Trans. Am. Fish. Soc.* **1997**, *126*, 397-417.
8. Coughlan, J.P.; Imsland, A.K.; Galvin, P.T.; Fitzgerald, R.D.; Naevdal, G.; Cross, T.F. Microsatellite DNA variation in wild populations and farmed strains of turbot from Ireland and Norway: a preliminary study. *J. Fish Biol.* **1998**, *52*, 916-922.
9. Ambali, A.J.D.; Doyle, R.W.; Cook, D.I. Genetic changes in *Oreochromis shiranus* (Trewavas) associated with the early stages of national aquaculture development in Malawi. *Aquac Res.* **1999**, *30*, 579-588.
10. Norris, A.T.; Bradley, D.G.; Cunningham, E.P. Microsatellite genetic variation between and within farmed and wild Atlantic salmon (*Salmo salar*) populations. *Aquaculture* **1999**, *180*, 247-264.
11. Xu, Z.; Primavera, J.H.; de la Pena, L.D.; Pettit, P.; Belak, J.; Alcivar-Warren, A. Genetic diversity of wild and cultured black tiger shrimp (*Penaeus monodon*) in the Philippines using microsatellites. *Aquaculture* **2001**, *199*, 13-40.
12. Koljonen, M.L.; Tahtinen, J.; Saisa, M.; Koskiniemi, J. Maintenance of genetic diversity of Atlantic salmon (*Salmo salar*) by captive breeding programmes and the geographic distribution of microsatellite variation. *Aquaculture* **2002**, *212*, 69-92.
13. Sekino, M.; Hara, M.; Taniguchi, N. Loss of microsatellite and mitochondrial DNA variation in hatchery strains of Japanese flounder *Paralichthys olivaceus*. *Aquaculture* **2002**, *213*, 101-122.

14. Alarcon, J.A.; Magoulas, A.; Georgakopoulos, T.; Zouros, E.; Alvarez, M.C. Genetic comparison of wild and cultivated European populations of the gilthead sea bream (*Sparus aurata*). *Aquaculture* **2004**, *230*, 65-80.
15. Evans, B.; Bartlett, J.; Sweijid, N.; Cook, P.; Elliott, N.G. Loss of genetic variation at microsatellite loci in hatchery produced abalone in Australia (*Haliotis rubra*) and South Africa (*Haliotis midae*). *Aquaculture* **2004**, *233*, 109-127.
16. Kim, J.E.; Withler, R.E.; Ritland, C.; Cheng, K.M. Genetic variation within and between domesticated chinook salmon, *Oncorhynchus tshawytscha*, strains and their progenitor populations. *Environ. Biol. Fishes* **2004**, *69*, 371-378.
17. Li, Q.; Park, C.; Endo, T.; Kijima, A. Loss of genetic variation at microsatellite loci in hatchery strains of the Pacific abalone (*Haliotis discus hannai*). *Aquaculture* **2004**, *235*, 207-222.
18. Page, K.S.; Scribner, K.T.; Burnham-Curtis, M. Genetic diversity of wild and hatchery lake trout populations: Relevance for management and restoration in the Great Lakes. *Trans. Am. Fish. Soc.* **2004**, *133*, 674-691.
19. Skaala, O.; Hoyheim, B.; Glover, K.; Dahle, G. Microsatellite analysis in domesticated and wild Atlantic salmon (*Salmo salar* L.): allelic diversity and identification of individuals. *Aquaculture* **2004**, *240*, 131-143.
20. Lehoczy, I.; Jeney, Z.; Magyary, I.; Hancz, C.; Kohlmann, K. Preliminary data on genetic variability and purity of common carp (*Cyprinus carpio* L.) strains kept at the live gene bank at Research Institute for Fisheries, Aquaculture and Irrigation (HAKI) Szarvas, Hungary. *Aquaculture* **2005**, *247*, 45-49.
21. Lundrigan, T.A.; Reist, J.D.; Ferguson, M.M. Microsatellite genetic variation within and among Arctic charr (*Salvelinus alpinus*) from aquaculture and natural populations in North America. *Aquaculture* **2005**, *244*, 63-75.
22. Dillman, C.B.; Koppelman, J.B. Genetic diversity among hatchery stocks and established populations of rainbow trout in Missouri. *Trans. Am. Fish. Soc.* **2006**, *135*, 341-347.
23. Narum, S.R.; Boe, S.; Moran, P.; Powell, M. Small-scale genetic structure and variation in steelhead of the Grande Ronde River, Oregon, USA. *Trans. Am. Fish. Soc.* **2006**, *135*, 979-986.
24. Pampoulie, C.; Jorundsdottir, T.D.; Steinarsson, A.; Petursdottir, G.; Stefansson, M.O.; Danielsdottir, A.K. Genetic comparison of experimental fanned strains and wild Icelandic populations of Atlantic cod (*Gadus morhua* L.). *Aquaculture* **2006**, *261*, 556-564.
25. Vercaemer, B.; Spence, K.R.; Herbinger, C.M.; Lapegue, S.; Kenchington, E.L. Genetic diversity of the European oyster (*Ostrea edulis* L.) in Nova Scotia: Comparison with other parts of Canada, Maine and Europe and implications for broodstock management. *J. Shell Res.* **2006**, *25*, 543-551.
26. Chareontawee, K.; Poompuang, S.; Na-Nakorn, U.; Kamonrat, W. Genetic diversity of hatchery stocks of giant freshwater prawn (*Macrobrachium rosenbergii*) in Thailand.



*Argriculture* **2007**, 271, 121-129.

27. Gross, R.; Lulla, P.; Paaver, T. Genetic variability and differentiation of rainbow trout (*Oncorhynchus mykiss*) strains in northern and Eastern Europe. *Argriculture* **2007**, 272.
28. Memiş, D.; Kohlmann, K. Genetic characterization of wild common carp (*Cyprinus carpio* L.) from Turkey. *Argriculture* **2006**, 258, 257-262.
29. Li, Q.; Xu, K.F.; Yu, R.H. Genetic variation in Chinese hatchery populations of the Japanese scallop (*Patinopecten yessoensis*) inferred from microsatellite data. *Aquaculture* **2007**, 269, 211-219.
30. Thai, B.; Burrridge, C.; Austin, C. Genetic diversity of common carp (*Cyprinus carpio* L.) in Vietnam using four microsatellite loci. *Argriculture* **2007**, 269, 174-186.
31. Withler, R. E.; Rundle, T.; Beacham, T.D. Genetic identification of wild and domesticated strains of chinook salmon (*Oncorhynchus tshawytscha*) in southern British Columbia, Canada. *Aquaculture* **2007**, 272, 161-171.
32. Chen, L.; Yang, J. Microsatellite genetic variation in wild and hatchery populations of the sea cucumber (*Apostichopus japonicus* Selenka) from northern China. *Aquac. Res.* **2008**, 39, 1541-1549.
33. Sugaya, T.; Sato, M.; Yokoyama, E.; Nemoto, Y.; Fujita, T.; Okouchi, H.; Hamasaki K.; Kitada, S. Population genetic structure and variability of Pacific herring *Clupea pallasii* in the stocking area along the Pacific coast of northern Japan. *Fish Sci.* **2008**, 74, 579-588.
34. Chen, Y. J.; Conway, C.; Keeler-Foster, C.; Hamman, R.; Meisner, S. Genetic characterization of variation in captive and wild woundfin. *North Am. J. Fish Manage.* **2009**, 29, 843-849.
35. Fauvelot, C.; Bertozzi, F.; Costantini, F.; Airoidi, L.; Abbiati, M. Lower genetic diversity in the limpet *Patella caerulea* on urban coastal structures compared to natural rocky habitats. *Mar. Biol.* **2009**, 156, 2313-2323.
36. Ha, H.; Nguyen, T.; Poompuang, S.; Na-Nakorn, U. Microsatellites revealed no genetic differentiation between hatchery and contemporary wild populations of striped catfish, *Pangasianodon hypophthalmus* (Sauvage 1878) in Vietnam. *Argriculture* **2009**, 291, 154-160.
37. Kitada, S.; Shishidou, H.; Sugaya, T.; Kitakado, T.; Hamasaki, K.; Kishino, H. Genetic effects of long-term stock enhancement programs. *Argriculture* **2009**, 290, 69-79.
38. Lind, C.; Evans, B.; Knauer, J.; Taylor, J.; Jerry, D. Decreased genetic diversity and a reduced effective population size in cultured silver-upped pearl oysters (*Pinctada maxima*). *Argriculture* **2009**, 286, 12-19.
39. Liu, F.; Xia, J.; Bai, Z.; Fu, J. J.; Li, J.; Yue, G. H. High genetic diversity and substantial population differentiation in grass carp (*Ctenopharyngodon idella*) revealed by microsatellite analysis. *Argriculture* **2009**, 297, 51-56.
40. Na-Nakorn, U.; Moeikum, T. Genetic diversity of domesticated stocks of striped catfish, *Pangasianodon hypophthalmus* (Sauvage 1878), in Thailand: Relevance to broodstock

management regimes. *Agriculture* **2009**, 297, 70-77.

41. Nielsen, J.; Carpanzano, C.; Fountain, M.; Gan, C. Mitochondrial DNA and Nuclear Microsatellite Diversity in Hatchery and Wild *Oncorhynchus mykiss* from Freshwater Habitats in Southern California. *Trans. Am. Fish. Soc.* **1997**, 126, 397-417.
42. Yue, G.H.; Zhu, Z.; Lo, L.; Wang, C.; Lin, G.; Feng, F.; Orbán, L. Genetic variation and population structure of Asian seabass (*Lates calcarifer*) in the Asia-Pacific region. *Agriculture* **2009**, 293, 22-28.
43. Aung, O.; Nguyen, T.; Poompuang, S.; Kamonrat, W. Microsatellite DNA markers revealed genetic population structure among captive stocks and wild populations of mrigal, *Cirrhinus cirrhosus* in Myanmar. *Agriculture* **2010**, 299, 37-43.
44. Petersen, J.L.; Ibarra, A.M.; May, B. Nuclear and mtDNA lineage diversity in wild and cultured Pacific lion-paw scallop, *Nodipecten subnodosus* (Baja California Peninsula, Mexico). *Mar. Biol.* **2010**, 157, 2751-2767.
45. An, H.S.; Kim, E.M.; Lee, J.H.; Noh, J.K., An, C.M.; Yoon, S.J.; Park, K.D.; Myeong, J.I. Population genetic structure of wild and hatchery black rockfish *Sebastes inermis* in Korea, assessed using cross-species microsatellite markers. *Genet. Mol. Res.* **2011**, 10, 2492-2504.
46. An, H.S.; Lee, J.W.; Park, J.Y. Population genetics of the Pacific abalone (*Haliotis discus hannai*) in Korea inferred from microsatellite marker analysis. *Genet. Mol. Res.* **2012**, 11, 3904-3922.
47. Kochmann, J.; Carlsson, J.; Crowe, T.P.; Mariani, S. Genetic evidence for the uncoupling of local aquaculture activities and a population of an invasive species—a case study of Pacific oysters (*Crassostrea gigas*). *J. Hered.* **2012**, 103, 661-671.
48. Lin, G.; Lo, L.C.; Yue, G.H. Genetic variations in populations from farms and natural habitats of Asian green mussel, *Perna viridis*, in Singapore inferred from nine microsatellite markers. *J. World Aquacult Soc.* **2012**, 43, 270-277.
49. Nugraha, M.F.I.; Pouyaud, L.; Carman, O.; Widyastuti, U.; Junior, M.Z.; Kadarusman; Avarre, J.C. Genetic diversity of Boeseman's Rainbowfish (*Melanotaenia boesemani*) reared in Indonesian farms compared to endangered natural populations. *Trop. Conserv. Sci.* **2015**, 8, 796-812.
50. Rhode, C.; Hepple, J.; Jansen, S.; Davis, T.; Vervalle, J.; Bester-van D.M., Aletta E.; Roodt-Wilding, R. A population genetic analysis of abalone domestication events in South Africa: Implications for the management of the abalone resource. *Aquaculture* **2012**, 356-357, 235-242.
51. Wang, L.; Shi, X.F.; Su, Y.Q.; Meng, Z.N.; Lin, H.R. Loss of genetic diversity in the cultured stocks of the large yellow croaker, *Larimichthys crocea*, revealed by microsatellites. *Int. J. Mol. Sci.* **2012**, 13, 5584-5597.
52. Yu, J.N.; Azuma, N.; Abe, S. Genetic differentiation between collections of hatchery and wild masu salmon (*Oncorhynchus masou*) inferred from mitochondrial and microsatellite DNA analyses. *Environ. Biol. Fish* **2012**, 94, 259-271.

53. An, H.S.; Lee, J.W.; Park, J.Y.; Jung, H.T. Genetic structure of the Korean black scraper *Thamnaconus modestus* inferred from microsatellite marker analysis. *Mol. Biol. Rep.* **2013**, *40*, 3445-3456.
54. Thormann, I.; Gaisberger, H.; Mattei, F.; Snook, L.; Arnaud, E. Digitization and online availability of original collecting mission data to improve data quality and enhance the conservation and use of plant genetic resources. *Genet. Resour. Crop Evol.* **2012**, *59*, 635-644.
55. An, H.S.; Nam, M.M.; Myeong, J.I.; An, C.M. Genetic diversity and differentiation of the Korean starry flounder (*Platichthys stellatus*) between and within cultured stocks and wild populations inferred from microsatellite DNA analysis. *Mol. Biol. Rep.* **2014**, *41*, 7281-7292.
56. Bingham, D.M.; Kennedy, B.M.; Hanson, K.C.; Smith, C.T. Loss of genetic integrity in hatchery steelhead produced by juvenile-based broodstock and wild integration: conflicts in production and conservation goals. *N. Am. J. Fish Manage.* **2014**, *34*, 609-620.
57. Johnson, M.A.; Friesen, T.A. Genetic diversity and population structure of spring Chinook salmon from the upper Willamette River, Oregon. *N. Am. J. Fish Manage.* **2014**, *34*, 853-862.
58. Kong, L.F.; Bai, J.; Li, Q. Comparative assessment of genomic SSR, EST-SSR and EST-SNP markers for evaluation of the genetic diversity of wild and cultured Pacific oyster, *Crassostrea gigas* Thunberg. *Aquaculture* **2014**, *420*, S85-S91.
59. Maureen, P.S.; Thom, H.J.; Cherril, B.; Edith, M. Genetic assessment of a summer chum salmon metapopulation in recovery. *Evol. Appl.* **2014**, *7*, 266-285.
60. Xing, K.; Gao, M.L.; Li, H.J. Genetic differentiation between natural and hatchery populations of Manila clam (*Ruditapes philippinarum*) based on microsatellite markers. *Genet. Mol. Res.* **2014**, *13*, 237-245.
61. Hargrove, J.S.; Sturmer, L.; Scarpa, J.; Austin, J.D. Assessment of genetic diversity in wild and aquaculture stocks of *Mercenaria mercenaria* in Florida. *J. Shellfish Res.* **2015**, *34*, 355-365.
62. Nugraha, M.F.I.; Pouyaud, L.; Carman, O.; Widyastuti, U.; Zairin, M.; Kadarusman, Avarre, J.C. Genetic diversity of Boeseman's Rainbowfish (*Melanotaenia boesemani*) reared in Indonesian farms compared to endangered natural populations. *Trop. Conserv. Sci.* **2015**, *8*, 796-812.
63. Qi, P.Z.; Qin, J.H.; Xie, C.X. Determination of genetic diversity of wild and cultured topmouth culter (*Culter alburnus*) inhabiting China using mitochondrial DNA and microsatellites. *Biochem. Syst. Ecol.* **2015**, *61*, 232-239.
64. Thanh, H.N.; Liu, Q.G.; Zhao, L.J.; Zhang, H.; Liu, J. Genetic diversity of the cultured giant freshwater prawn (*Macrobrachium rosenbergii*) in China based on microsatellite markers. *Biochem. Syst. Ecol.* **2015**, *59*, 144-154.
65. Yang, M.; Tian, C.; Liang, X.F.; Zheng, H.; Zhao, C.; Zhu, K. Genetic structure and diversity in natural and stocked populations of the mandarin fish (*Siniperca chuatsi*) in China. *Genet. Mol. Res.* **2015**, *14*, 5153-5160.

66. Kotoulas, G.; Agnès, J.F.; Zouros, E. Microsatellite variation in the African catfish *Chrysichthys nigrodigitatus* (LACEPED1E8, 03) (Siluroidei, Claroteidae). *Aquacult. Fish Manag.* **1991**, *22*, 285-288.
67. Jackson, T.R.; Martin-Robichaud, D.; Reith, M.E. Application of DNA markers to the management of Atlantic halibut (*Hippoglossus hippoglossus*) broodstock. *Aquaculture* **2003**, *220*, 245-259.
68. Jackson, R.B.; Linder, C.R.; Lynch, M.; Purugganan, M.; Somerville, S.; Thayer, S.S. Linking molecular insight and ecological research. *Trends Ecol. Evol.* **2002**, *17*, 409-414.
69. Barroso, R.M.; Hilsdorf, A.W.; Moreira, H.L.; Cabello, P.H.; Traub-Cseko, Y.M. Genetic diversity of wild and cultured populations of *Brycon opalinus* (Cuvier, 1819) (Characiforme, Characidae, Bryconinae) using microsatellites. *Aquaculture* **2005**, *247*, 51-65.
70. Carlsson, J.; Morrison, C.L.; Reece, K.S. Wild and aquaculture populations of the eastern oyster compared using microsatellites. *J. Hered.* **2006**, *97*, 595-598.
71. Porta, J.; Porta, J.M.; Martínez-Rodríguez, G.; del Carmen Alvarez, M. Development of a microsatellite multiplex PCR for Senegalese sole (*Solea senegalensis*) and its application to broodstock management. *Aquaculture* **2006**, *256*, 159-166.
72. Zhu, Z.; Wang, C.; Lo, L.; Feng, F.; Lin, G.; Yue, G. Isolation, characterization, and linkage analyses of 74 novel microsatellites in Barramundi (*Lates calcarifer*). *Genome* **2006**, *49*, 969-976.
73. Wang, L.; Zhang, H.; Song, L.; Guo, X. Loss of allele diversity in introduced populations of the hermaphroditic bay scallop *Argopecten irradians*. *Aquaculture* **2007**, *271*, 252-259.
74. Matala, A.P.; Marx, S.; Wise, T.G. A genetically distinct wild redband trout (*Oncorhynchus mykiss gairdneri*) population in Crane Prairie Reservoir, Oregon, persists despite extensive stocking of hatchery rainbow trout (*O. m. irideus*). *Conserv. Genet.* **2008**, *9*, 1643-1652.
75. Shishidou, H.; Kitada, S.; Sakamoto, T.; Hamasaki, K. Genetic variability of wild and hatchery-released red sea bream in Kagoshima Bay, Japan, evaluated by using microsatellite DNA analysis. *Nippon Suisan Gakkaishi (Japan)* **2008**, *74*, 183-188.
76. Yang, C.; Zhu, X.; Sun, X. Development of microsatellite markers and their utilization in genetic diversity analysis of cultivated and wild populations of the mud carp (*Cirrhina molitorella*). *J. Genet. Genomics.* **2008**, *35*, 201-206.
77. Yang, Y.; Sterling, J.; Storici, F.; Resnick, M.A.; Gordenin, D.A. Hypermutability of damaged single-strand DNA formed at double-strand breaks and uncapped telomeres in yeast *Saccharomyces cerevisiae*. *PLoS genet.* **2008**, *4*, e1000264.
78. Lemay, M.A.; Boulding, E.G. Microsatellite pedigree analysis reveals high variance in reproductive success and reduced genetic diversity in hatchery-spawned northern abalone. *Aquaculture* **2009**, *295*, 22-29.
79. An, H.S.; Hong, S. W.; Lee, J.U.; Park, J.Y.; Kim, K.K. Genetic diversity of wild and farmed black sea bream populations in Jeju. *Anim. Cells Syst.* **2010**, *14*, 37-44.
80. An, H.S.; Lee, J.H.; Dong, C.M.; Noh, J.K.; Kim, H.C.; Park, C.J.; Park, K.D.; Min, B.H.; Park, J. W.; Myeong, J.I. New polymorphic microsatellite markers in Pacific abalone *Haliotis discus*

- hannai* and their application to genetic characterization of wild and aquaculture populations. *Genes. Genom.* **2010**, *32*, 413-418.
81. Pan, G.; Yang, J. Analysis of microsatellite DNA markers reveals no genetic differentiation between wild and hatchery populations of Pacific threadfin in Hawaii. *Int. J. Biol. Sci.* **2010**, *6*, 827.
  82. An, H.S.; Byun, S.G.; Kim, Y.C.; Lee, J.W.; Myeong, J.I. Wild and hatchery populations of Korean starry flounder (*Platichthys stellatus*) compared using microsatellite DNA markers. *Int J Mol. Sci.* **2011**, *12*, 9189-9202.
  83. An, H.S.; Hong, S.W.; Kim, E.M.; Myeong, J.I. Comparative genetic diversity of wild and hatchery populations of Korean threadsail filefish *Stephanolepis cirrhifer* using cross-species microsatellite markers. *Genes. Genom.* **2011**, *33*, 605-611.
  84. An, H.S.; Lee, J.W.; Dong, C.M. Population genetic structure of Korean pen shell (*Atrina pectinata*) in Korea inferred from microsatellite marker analysis. *Genes. Genom.* **2012**, *34*, 681-688.
  85. An, H.S.; Lee, J.W.; Park, J.Y.; Jung, H.T. Genetic structure of the Korean black scraper *Thamnaconus modestus* inferred from microsatellite marker analysis. *Mol. Biol. Rep.* **2013**, *40*, 3445-3456.
  86. Wachirachakarn, A.; Prakoon, W.; Nguyen, T.T.T.; Prompakdee, W.; Na-Nakorn, U. Loss of genetic variation of (*Phalacrodon bleekeri*) (Günther, 1864) in the hatchery stocks revealed by newly developed microsatellites. *Aquaculture* **2011**, *321*, 298-302.
  87. Wu, X.W.; Liu, X.D.; Cai, M.Y.; Ye, X.J.; Wang, Z.Y. Genetic analysis of farmed and wild stocks of large yellow croaker (*Larimichthys crocea*) by using microsatellite markers. *Afri. J. Biotechnol.* **2011**, *10*, 5773-5784.
  88. An, H.S.; Kim, E.M.; Lee, J.W.; Kim, D.J.; Kim, Y.C. New polymorphic microsatellite markers in the Korean mi-iuy croaker, *Miichthys miiuy*, and their application to the genetic characterization of wild and farmed populations. *Anim. Cells Syst.* **2012**, *16*, 41-49.
  89. An, H.S.; Lee, J.W.; Hong, S.W. Application of Novel Polymorphic microsatellite loci identified in the Korean Pacific abalone (*Haliotis diversicolor supertexta* (Haliotidae)) in the genetic characterization of wild and released populations. *Int. J. Mol. Sci.* **2012**, *13*, 10750-10764.
  90. Moyer, G.R.; Williams, A.S. Assessment of genetic diversity for american shad in the santee-cooper river basin of south carolina prior to hatchery augmentation. *Mar. Coast. Fish.* **2012**, *4*, 312-326.
  91. Sanchez, P.; Vinas, J.; Bremer, J.R.A.; Ambrosio, P.P.; Flos, R. Loss of genetic variability in a hatchery strain of senegalese sole (*Solea senegalensis*) revealed by sequence data of the mitochondrial DNA control region and microsatellite markers. *Sci. Mar.* **2012**, *76*, 225-235.
  92. An, H.S.; Lee, J.W.; Hong, S.W.; Hong, H.N.; Park, J.Y.; Myeong, J.I.; An, C.M. Genetic differences between wild and hatchery populations of red sea cucumber (*Stichopus japonicus*) inferred from microsatellite markers: implications for production and stocking programs design. *Genes Genom.* **2013**, *35*, 709-717.

93. An, H.S.; Lee, J.W.; Kim, H.Y.; Kim, J.B.; Chang, D.S.; Park, J.Y.; Myeong, J.I.; An, C.M. Genetic differences between wild and hatchery populations of Korean spotted sea bass (*Lateolabrax maculatus*) inferred from microsatellite markers. *Genes Genom.* **2013**, *35*, 671-680.
94. An, H.S.; Lee, J.W.; Kim, W.J.; Lim, H.J.; Kim, E.M.; Byun, S.G.; Hur, Y.B.; Park, J.Y.; Myeong, J.I.; An, C.M. Comparative genetic diversity of wild and hatchery-produced Pacific oyster (*Crassostrea gigas*) populations in Korea using multiplex PCR assays with nine polymorphic microsatellite markers. *Genes Genom.* **2013**, *35*, 805-815.
95. An, H.S.; Kang, H.W.; Han, H.S.; Park, J.Y.; Hong, C.G.; Park, J.; Myeong, J.I.; An, C.M. Genetic differences between the wild and hatchery-produced populations of Korean short barbeled grunter (*Hapalogenys nitens*) determined with microsatellite markers. *Genet. Mol. Res.* **2014**, *13*, 8901-8912.
96. Bernas, R.; Burzynski, A.; Debowski, P.; Pocwierz-Kotus, A.; Wenne, R. Genetic diversity within sea trout population from an intensively stocked southern Baltic river, based on microsatellite DNA analysis. *Fisheries Manag. Ecol.* **2014**, *21*, 398-409.
97. Borrell, Y.J.; Arias-Perez, A.; Freire, R.; Valdes, A.; Sanchez, J.A.; Mendez, J.; Martinez, D.; Lopez, J.; Carleos, C.; Blanco, G.; Insua, A.M. Microsatellites and multiplex PCRs for assessing aquaculture practices of the grooved carpet shell *Ruditapes decussatus* in Spain. *Aquaculture* **2014**, *426*, 49-59.
98. Karahan, B.; Gokcek, E.O.; Gamsiz, K.; Magoulas, A. Microsatellite polymorphism of seabass (*Dicentrarchus labrax*) breeders: natural and cultured stocks. *Fresenius Environ. Bull.* **2014**, *23*, 1289-1294.
99. Pan, T.; Zhang, Y.; Gao, T.X.; Li, F.H. Genetic diversity of *Pleuronectes yokohamae* population revealed by fluorescence microsatellite labeled. *Biochem. Syst Ecol.* **2014**, *55*, 118-124.
100. Rhode, C.; Maduna, S.N.; Roodt-Wilding, R and Bester-van, der., Merwe, A.E. Comparison of population genetic estimates amongst wild, F1 and F2 cultured abalone (*Haliotis midae*). *Anim. Genet.* **2014**, *45*, 456-459.
101. Hunter, M.E.; Nico, L.G. Genetic analysis of invasive Asian Black Carp (*Mylopharyngodon piceus*) in the Mississippi River Basin: evidence for multiple introductions. *Biol. Invasions.* **2015**, *17*, 99-114.
102. Kelson, S.; Kapuscinski, A.; Timmins, D.; Ardren, W. Fine-scale genetic structure of brook trout in a dendritic stream network. *Conserv. Genet.* **2015**, *16*, 31-42.
103. Straus, K.M.; Vadopalas, B.; Davis, J.P and Friedman, C.S. Reduced genetic variation and decreased effective number of breeders in five year-classes of cultured geoducks (*Panopea generosa*). *J. Shellfish Res.* **2015**, *34*, 163-169.
104. Yu, J.N.; Choi, S.H.; Kweon, S.M.; Kim, S.K.; Jin, D.H.; Kim, G.S.; Yeo, J.H.; Kim, S. New polymorphic microsatellite markers for the masu salmon (*Oncorhynchus masou masou*) from Korea and their application to wild and hatchery populations. *Biochem. Syst. Ecol.* **2015**, *61*, 260-267.
105. Šegvić-Bubić, T.; Grubišić, L.; Trumbić, Ž.; Stanić, R.; Ljubković, J.; Maršić-Lučić, J.; Katavić, I.

- Genetic characterization of wild and farmed European seabass in the Adriatic sea: assessment of farmed escapees using a Bayesian approach. *Ices. J. Mar. Sci.* **2017**, *74*, 369-378.
106. Li, X.Y.; Deng, Y.P.; Yang, K.; Gan, W.X.; Zeng, R.K.; Deng, L.J.; Song, Z.B. Genetic Diversity and Structure Analysis of *Percocypris pingi* (Cypriniformes: Cyprinidae): Implications for Conservation and Hatchery Release in the Yalong River. *Plos One*. **2016**, *11*, e0166769.
  107. Segovia-Viadero, M.; Serrao, E.A.; Canteras-Jordana, J.C.; Gonzalez-Wanguemert, M. Do hatchery-reared sea urchins pose a threat to genetic diversity in wild populations? *Heredity* **2016**, *116*, 378-383.
  108. Loughnan, S.R.; Smith-Keune, C.; Jerry, D.R.; Beheregaray, L.B.; Robinson, N.A. Genetic diversity and relatedness estimates for captive barramundi (*Lates calcarifer*, Bloch) broodstock informs efforts to form a base population for selective breeding. *Aquac. Res.* **2016**, *47*, 3570-3584.
  109. Jaris, H.; Brown, D.S.; Proestou, D.A. Assessing the contribution of aquaculture and restoration to wild oyster populations in a Rhode Island coastal lagoon. *Conserv. Genet.* **2019**, *20*, 503-516.
  110. del Pazo, F.; Sanchez, S.; Posner, V.; Sciara, A.A.; Arranz, S.E.; Villanova, G.V. Genetic diversity and structure of the commercially important native fish pacu (*Piaractus mesopotamicus*) from cultured and wild fish populations: relevance for broodstock management. *Aquacult. Int.* **2021**, *29*, 289-305.
  111. Hsu, T.H.; Huang, C.W.; Lee, H.T.; Kuo, Y.H.; Liu, K.M.; Lin, C.H.; Gong, H.Y. Population Genetic Analysis for Stock Enhancement of Silver Sea Bream (*Rhabdosargus sarba*) in Taiwan. *Fishes* **2020**, *5*, 19.
  112. Oliveira, E.A.; Perez, M.F.; Bertollo, L.A.C.; Gestich, C.C.; Rab, P.; Ezaz, T.; Souza, F.H.S.; Viana, P.; Feldberg, E.; Oliveira, E.H.C.; Cioffi, M.B. Historical demography and climate driven distributional changes in a widespread Neotropical freshwater species with high economic importance. *Ecography* **2020**, *43*, 1291-1304.
  113. Bogdanowicz, W.; Rutkowski, R.; Gabrielyan, B.K.; Ryspaev, A.; Asatryan, A.N.; Mkrtchyan, J.A.; Bujalska, B.M. Fish introductions in the former Soviet Union: The Sevan trout (*Salmo ischchan*)-80 years later. *Plos One*. **2017**, *12*, e0180605.
  114. Hemstrom, W.; van de Wetering, S.; Banks, M. Fish ladder installation across a historical barrier asymmetrically increased conspecific introgressive hybridization between wild winter and summer run steelhead salmon in the Siletz River, Oregon. *Can. J. Fish Aquat. Sci.* **2017**, *75*, 1383-1392.
  115. White, S.L.; Miller, W.L.; Dowell, S.A.; Bartron, M.L.; Wagner, T. Limited hatchery introgression into wild brook trout (*Salvelinus fontinalis*) populations despite reoccurring stocking. *Evol. Appl.* **2018**, *11*, 1567-1581.
  116. Berrebi, P.; Caputo, B.V.; Splendiani, A.; Muracciole, S.; Sabatini, A.; Palmas, F. Brown trout (*salmo trutta* L.) high genetic diversity around the Tyrrhenian Sea as revealed by nuclear and mitochondrial markers. *Hydrobiologia* **2019**, *826*, 209-231.
  117. Fazzi-Gomes, P.F.; Aguiar, J.D.; Marques, D.; Cabral, G.F.; Moreira, F.C.; Rodrigues, M.D.N.; Silva, C.S.; Hamoy, I.; Santos, S. Novel Microsatellite Markers Used for Determining Genetic

Diversity and Tracing of Wild and Farmed Populations of the Amazonian Giant Fish *Arapaima gigas*. *Genes* **2021**, *12*, 1324.

118. Jorge, P.H.; Mastrochirico-Filho, V.A.; Hata, M.E.; Mendes, N.J.; Ariede, R.B.; de Freitas, M.V.; Vera, M.; Porto-Foresti, F.; Hashimoto, D.T. Genetic Characterization of the Fish *Piaractus brachipomus* by Microsatellites Derived from Transcriptome Sequencing. *Front. Genet.* **2018**, *9*, 46.
119. Yamachita, A.L.; Pandolfi, V.C.F.; de Souza, F.P.; de Godoy, S.M.; de Lima, E.C.S.; Pereira, U.D.; Povh, J.A.; Campos, E.C.; Ayres, D.R.; Bignardi, A.B.; Ruas, C.D.; Lopera-Barrero, N.M. Evaluation of a panel of microsatellite markers to study their applications in *Serrapinnus notomelas* and to reveal the genetic diversity in *Hyphessobrycon eques*. *Anim. Biotechnol.* **2020**.
120. Deng, Y.P. Development of microsatellite markers and analysis of genetic diversity in wild and cultured populations of Kumamoto oyster (*Crassostrea sikamea*). Chongqing Normal University, China. **2020**.
121. Barasa, J.E.; Mdyogolo, S.; Abila, R.; Grobler, J.P.; Skilton, R.A.; Bindeman, H.; Njahira, M.N.; Chemoiwa, E.J.; Dangasuk, O.G.; Kaunda-Arara, B.; Verheyen, E. Genetic diversity and population structure of the African catfish, *Clarias gariepinus* (Burchell, 1822) in Kenya: implication for conservation and aquaculture. *Belg. Zool.* **2017**, *147*, 105-127.
122. Sipos, D.K.; Kovacs, G.; Buza, E.; Csenki-Bakos, K.; Osz, A.; Ljubobratovic, U.; Cservedi-Szucs, R.; Bercsenyi, M.; Lehoczy, I.; Urbanyi, B.; Kovacs, B. Comparative genetic analysis of natural and farmed populations of pike-perch (*Sander lucioperca*). *Aquacult. Int.* **2019**, *27*, 991-1007.
